# Supplementary material
Source: publisher figshare collection journal article supplement (https://acs.figshare.com/ndownloader/files/3867403)
Supplement: Supplementary file 1 [file 3867403]

# Supporting information

## **Photoluminescence of Graphene Oxide Infiltrated into Mesoporous Silicon**

Ilaria Rea<sup>1\*</sup>, Lucia Sansone<sup>2</sup>, Monica Terracciano<sup>1,3</sup>, Luca De Stefano<sup>1</sup>, Principia  
Dardano<sup>1</sup>, Michele Giordano<sup>2</sup>, Anna Borriello<sup>2</sup> and Maurizio Casalino<sup>1</sup>

<sup>1</sup>*Institute for Microelectronics and Microsystems, National Council of Research, Naples, Italy*

<sup>2</sup>*Institute for Polymers, Composites and Biomaterials, National Council of Research, Naples, Italy*

<sup>3</sup>*Department of Pharmacy, University of Naples Federico II, Naples, Italy*

## **Raman analysis**

Raman spectrum of graphene oxide deposited on crystalline silicon was obtained using a Confocal Raman Microscope LABRAM Aramis (by Horiba Jobin-Yvon, France). A laser with a wavelength of 532 nm was used as excitation source. The objective used to perform the analysis was a 50x with a long working distance. The characteristic Raman spectrum of graphene oxide includes the G peak at  $1580\text{ cm}^{-1}$ , the D peak at  $1350\text{ cm}^{-1}$ , the 2D peak at  $2700\text{ cm}^{-1}$  and the D+G peak at  $2940\text{ cm}^{-1}$ . Figure S1 shows Raman spectrum of GO deposited on crystalline Si.

## **Amorphous silicon fabrication and optical characterization**

Amorphous silicon (aSi) was fabricated starting from a quartz microscope slide. After a substrate cleaning, aSi was deposited on top by a Plasma Enhanced Chemical Vapor Deposition (PECVD) process at a pressure of 0.8 mbar, temperature of  $250\text{ }^{\circ}\text{C}$ , power of 2W and a  $\text{SiH}_4$  (5% in He) flow of 600 sccm. Sample was then treated in Piranha solution and silanized, following the procedure reported in section 2.2. GO was deposited on aminosilane-modified aSi, following the procedure reported in section 2.3. GO-deposited aSi sample (GO-aSi) was optically characterized in terms of spectroscopic reflectometry and photoluminescence. Figure S2 shows reflectivity spectra of bare aminosilane-modified aSi and of GO-aSi. A comparison between reflectivity and photoluminescence spectra of GO-aSi is reported in Figure S3.

## **Confocal microscopy imaging**

Confocal microscopy is an imaging technique allowing to acquire single fluorescent focal plane excluding out-of-plane fluorescence. Confocal imaging of GO-PSi hybrid structure was performed using a LSM700 laser scanning microscope system (Carl Zeiss Inc., Peabody, MA), at 63x magnification. Sample fluorescence was excited at 488 nm. Images were acquired each  $0.5\text{ }\mu\text{m}$  along the optical axis z. Figure S4A shows confocal microscopy images of GO infiltrated PSi layer; first image ( $0\text{ }\mu\text{m}$ ) is referred to sample surface, last one ( $-2.5\text{ }\mu\text{m}$ ) to the silicon substrate. Corresponding fluorescence intensities, calculated from images of Figure S4A using ImageJ software (<http://imagej.nih.gov/ij/>), are reported in Figure S4B.

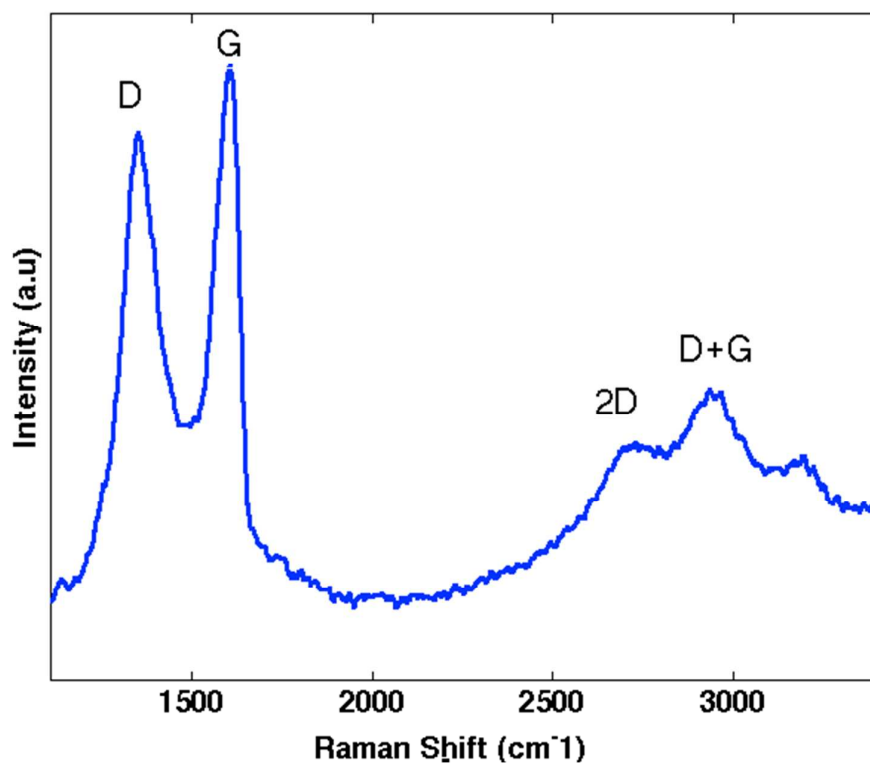

**Figure S1.** Raman spectrum of GO deposited on crystalline Si.

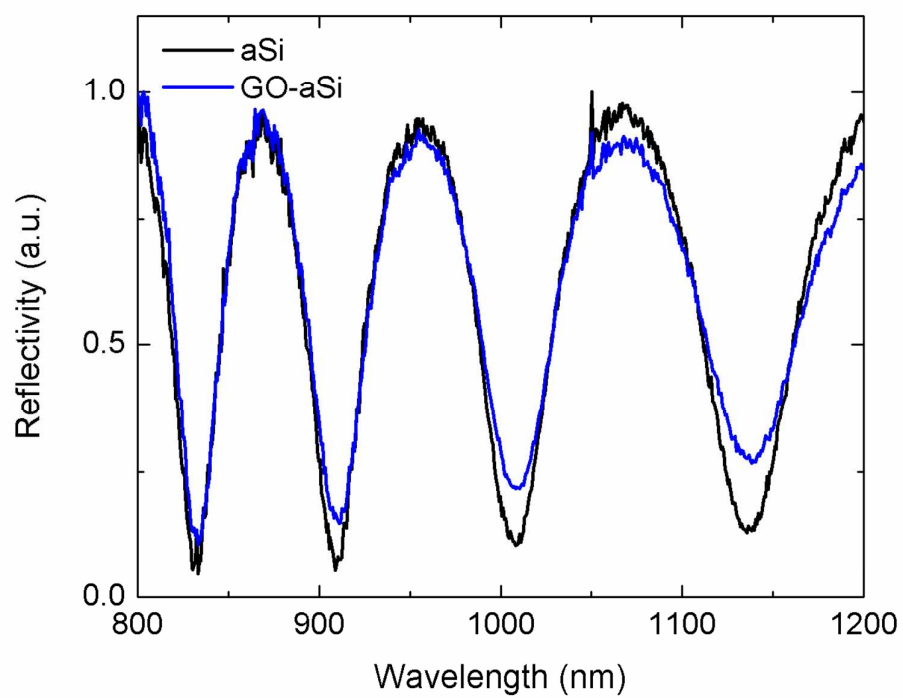

**Figure S2.** Reflectivity spectra of bare aminosilane-modified aSi and GO-aSi.

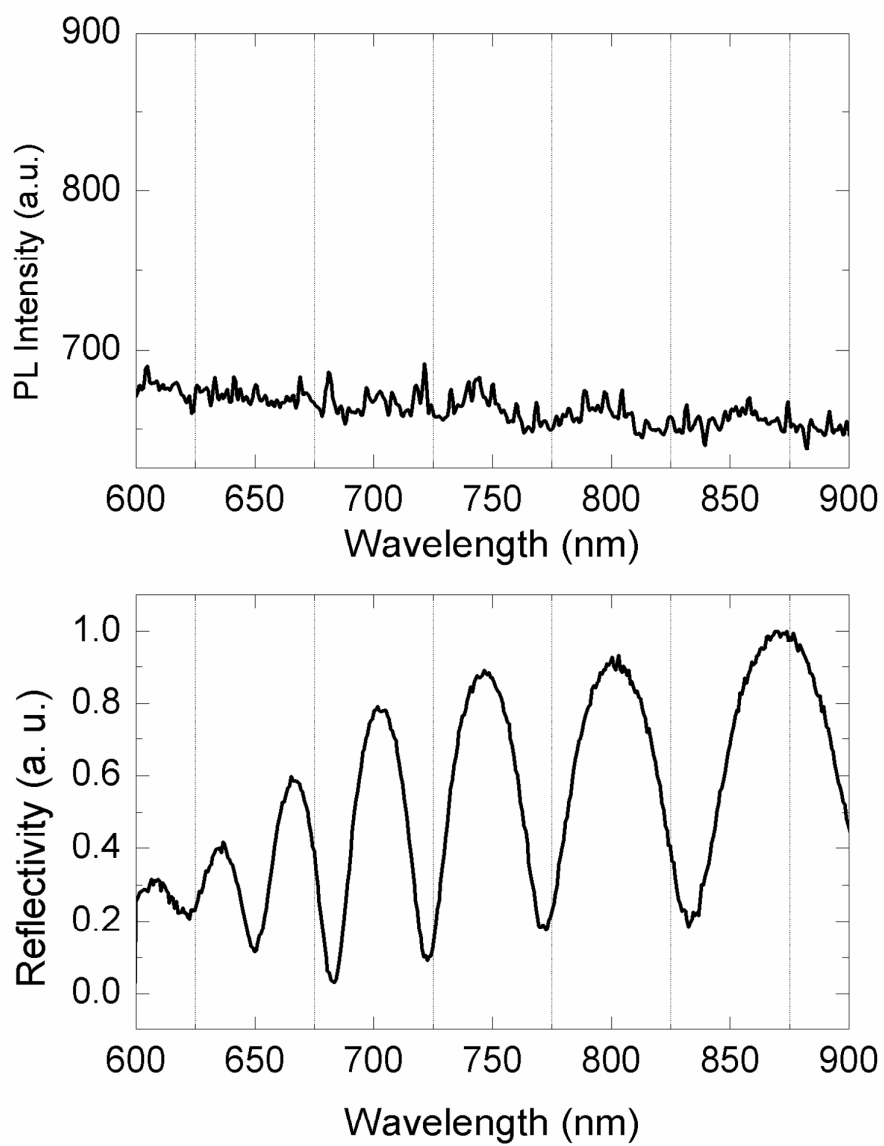

**Figure S3.** Comparison between photoluminescence spectrum (upper graph) and reflectivity spectrum (lower graph) of GO-deposited aSi.

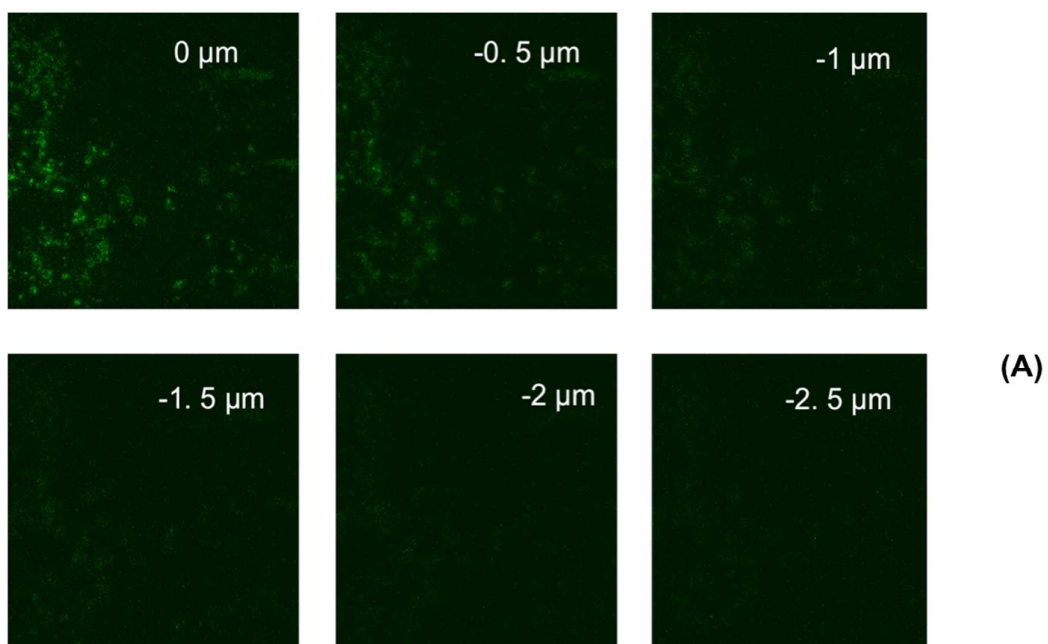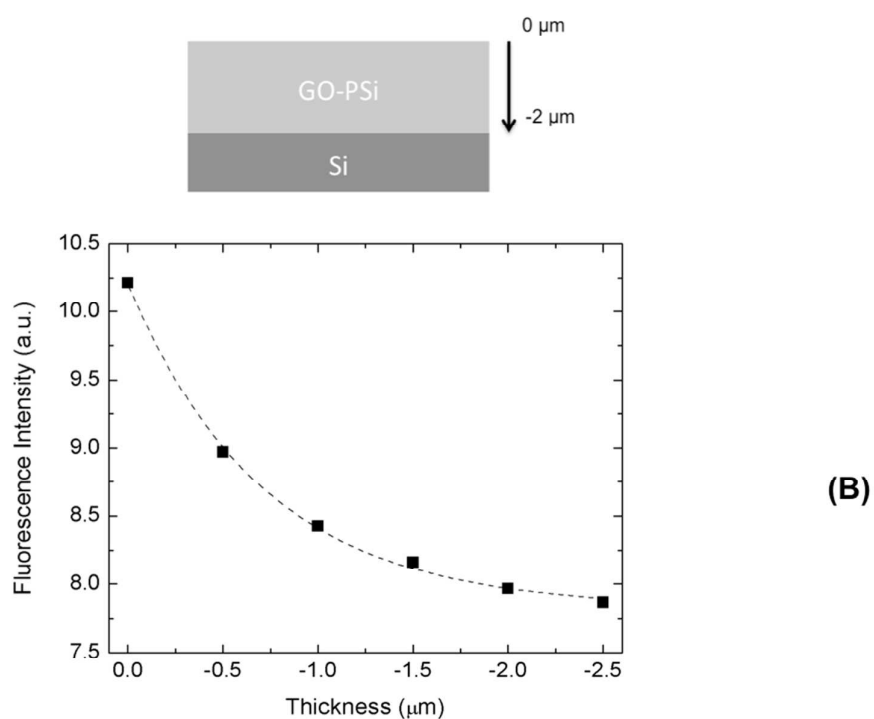

**Figure S4.** Confocal microscopy images of GO-PSi hybrid structure. The first image is referred to sample surface, the last one to silicon substrate (A). Fluorescence intensity profile estimated from confocal images (B).
